# Supplementary material for: Discovery of the First Insect Nidovirus, a Missing Evolutionary Link in the Emergence of the Largest RNA Virus Genomes
Source: PubMed Central journal article supplement (PMC3169540; doi:10.1371/journal.ppat.1002215), 2011-09-08

OMT+Exon share [%]

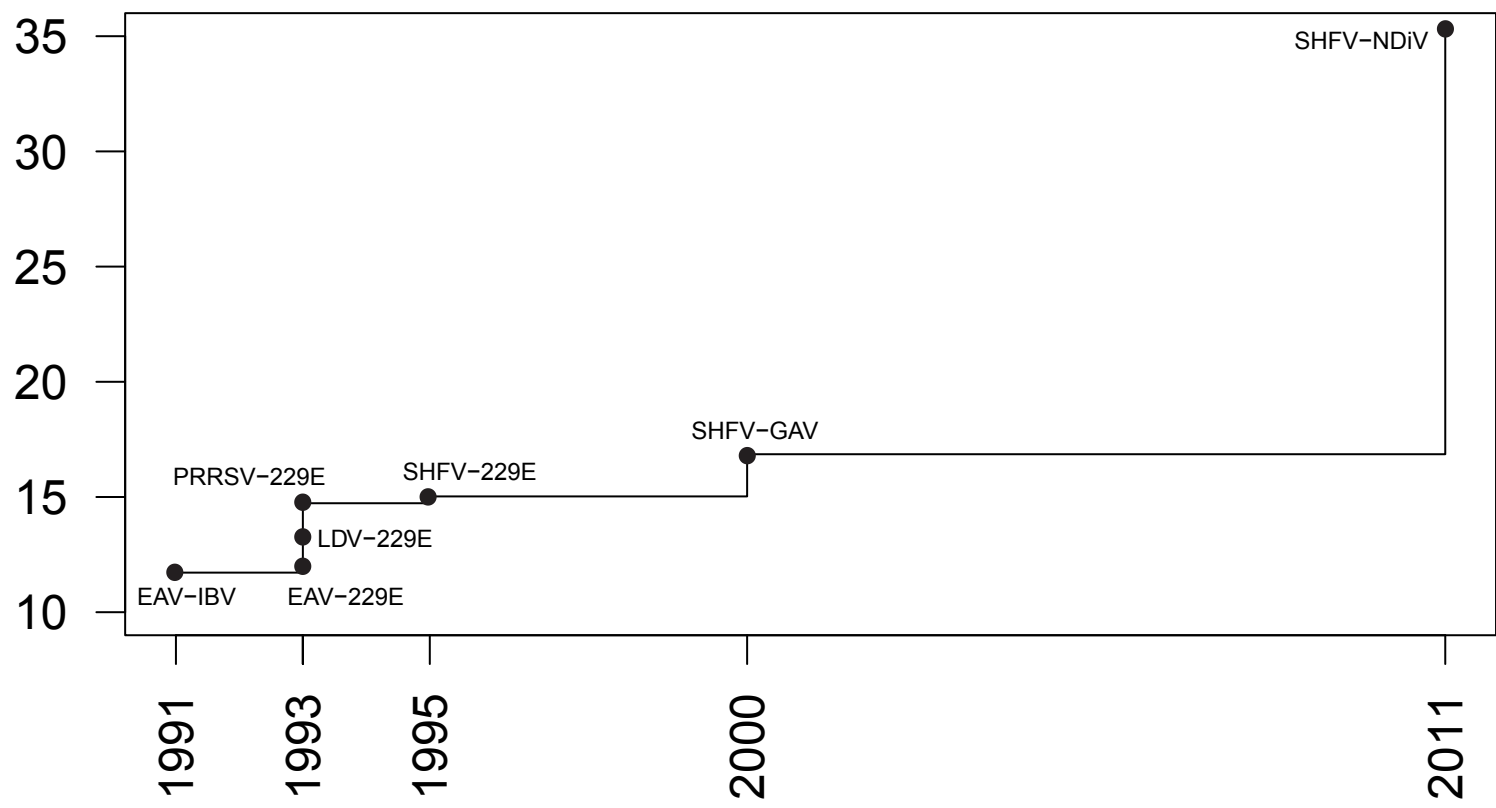

Supplement: ppat.1002215.s003.pdf [file ppat.1002215.s003.pdf]
